# Supplementary material for: Three-dimensional AuAg alloy NPs/graphene/AuAg alloy NP sandwiched hybrid nanostructure for surface enhanced Raman scattering properties
Source: Royal Society of Chemistry journal article supplement (doi:10.1039/d0tc02752a), 2020-01-01
Supplement: d0tc02752a1.pdf [file d0tc02752a1.pdf]

## Three-dimensional AuAg alloy NPs/graphene/AuAg alloy NPs sandwich hybrid nanostructure for surface enhanced Raman scattering property

Qingyan Han\*, Zhu Lu, Wei Gao, Meng Wu, Yongkai Wang, Zhongyu Wang, Jianxia Qi, and Jun Dong\*

*School of Electronic Engineering, Xi'an University of Posts & Telecommunications, Xi'an 710121 China*

\*Corresponding author: E-mail: [qyhan@xupt.edu.cn](mailto:qyhan@xupt.edu.cn); [dongjun@xupt.edu.cn](mailto:dongjun@xupt.edu.cn)

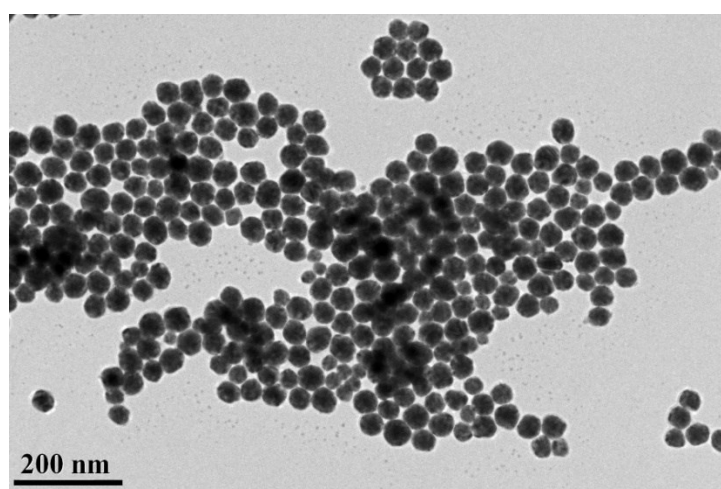

Fig. S1. TEM image of AuAg ANPs that have been stored for several.

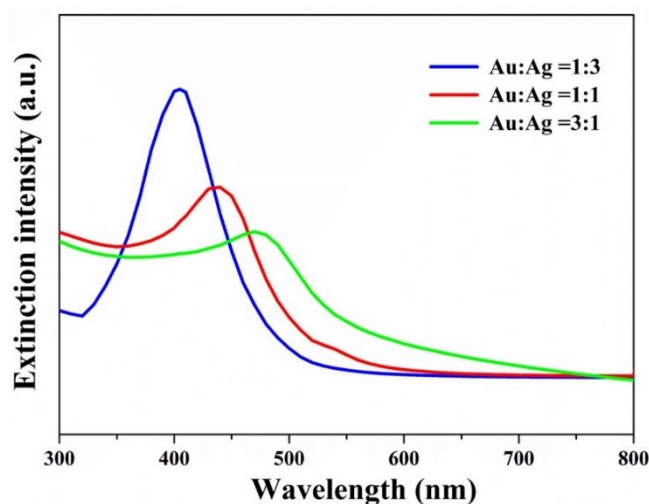

Fig. S2 The extinction spectra of  $\text{Au}_1\text{Ag}_3$  ANPs,  $\text{Au}_1\text{Ag}_1$  ANPs, and  $\text{Au}_3\text{Ag}_1$  ANPs, corresponding to the blue, red, and green curves.
